# Supplementary material for: Dynamics and Predictors of Mortality Due to Candidemia Caused by Different Candida Species: Comparison of Intensive Care Unit-Associated Candidemia (ICUAC) and Non-ICUAC
Source: MDPI journal article supplement (doi:10.3390/jof7080597), 2021-07-24
Supplement: s1 [file s1]

**Supplementary Table S3. Multivariate analysis of predictive factors related to 7-, 30- and 90-day mortalities of non-ICUAC by the four common *Candida* species**

| Species and variables <sup>a</sup> | 7-day               |                 | 30-day             |                 | 90-day            |                 |
|------------------------------------|---------------------|-----------------|--------------------|-----------------|-------------------|-----------------|
|                                    | OR (95% CI)         | <i>p</i> -Value | OR (95% CI)        | <i>p</i> -Value | OR (95% CI)       | <i>p</i> -Value |
| <i>C. albicans</i>                 |                     |                 |                    |                 |                   |                 |
| Lack of antifungal therapy         | 34.64 (7.86-152.68) | 0.006           | 10.49 (4.68-23.51) | <0.001          | 3.97 (2.32-6.79)  | <0.001          |
| CVC placement                      | -                   | -               | -                  | -               | 2.05 (1.20-3.51)  | 0.009           |
| Urinary catheter placement         | -                   | -               | 2.70 (1.25-5.84)   | 0.01            | 1.79 (1.07-2.99)  | 0.03            |
| Severe sepsis                      | -                   | -               | -                  | -               | 2.57 (1.49-4.43)  | 0.001           |
| Azole monotherapy                  | 0.06 (0.01-0.44)    | 0.01            | 0.26 (0.11-0.62)   | 0.002           | 0.33 (0.19-0.59)  | <0.001          |
| CVC removal                        | -                   | -               | -                  | -               | 0.34 (0.15-0.80)  | 0.01            |
| <i>C. tropicalis</i>               |                     |                 |                    |                 |                   |                 |
| Lack of antifungal therapy         | 7.74 (2.59-23.17)   | 0.04            | 4.54 (1.87-11.00)  | 0.001           | 6.02 (2.45-14.81) | <0.001          |
| Urinary catheter placement         | 3.91 (1.33-11.52)   | 0.01            | 3.68 (1.52-8.91)   | 0.004           | 3.69 (1.62-8.43)  | 0.002           |
| Diabetes mellitus                  | -                   | -               | -                  | -               | 0.21 (0.07-0.65)  | 0.007           |
| <i>C. glabrata</i>                 |                     |                 |                    |                 |                   |                 |
| Lack of antifungal therapy         | -                   | -               | 5.02 (1.82-13.88)  | 0.002           | -                 | -               |
| Myocardial infarction              | 5.71 (1.17-27.80)   | 0.03            | -                  | -               | -                 | -               |
| Total parental nutrition           | -                   | -               | 2.74 (1.17-6.44)   | 0.02            | 2.35 (1.09-5.03)  | 0.03            |
| Bacteremia                         | -                   | -               | 4.22 (1.44-12.34)  | 0.009           | 3.12 (1.40-6.98)  | 0.005           |
| Male                               | -                   | -               | -                  | -               | 2.48 (1.12-5.51)  | 0.03            |
| Aged 65 or older                   | -                   | -               | 0.42 (0.18-0.98)   | 0.05            | -                 | -               |
| <i>C. parapsilosis</i>             |                     |                 |                    |                 |                   |                 |

|                      |                     |      |                        |      |                        |       |
|----------------------|---------------------|------|------------------------|------|------------------------|-------|
| Prior fungal therapy | 20.83 (1.28-339.02) | 0.03 | 114.11 (5.07-2,566.86) | 0.03 | 221.43 (7.17-6,835.92) | 0.002 |
| Severe sepsis        | -                   | -    | 7.92 (1.58-39.62)      | 0.01 | 6.73 (1.39-32.66)-     | 0.02  |

Abbreviations: ICUAC, intensive care unit-associated candidemia; OR, odds ratio; 95% CI, 95% confidence interval; CVC, central venous catheter.

<sup>a</sup>Only the variables that were statistically significant ( $P < 0.05$ ) are listed.
