# Supplementary material for: Dynamics and Predictors of Mortality Due to Candidemia Caused by Different Candida Species: Comparison of Intensive Care Unit-Associated Candidemia (ICUAC) and Non-ICUAC
Source: MDPI journal article supplement (doi:10.3390/jof7080597), 2021-07-24
Supplement: s1 [file s1]

**Supplementary Table S2A. Univariate analysis of predictive factors related to 7-, 30- and 90-day mortalities of ICUAC and non-ICUAC due to *Candida albicans***

| Variables                                             | Setting   | 7-day mortality    |                 | 30-day mortality |                 | 90-day mortality |                 |
|-------------------------------------------------------|-----------|--------------------|-----------------|------------------|-----------------|------------------|-----------------|
|                                                       |           | OR (95% CI)        | <i>p</i> -Value | OR (95% CI)      | <i>p</i> -Value | OR (95% CI)      | <i>p</i> -Value |
| Aged 65 or older                                      | ICUAC     | 1.65 (0.85-3.19)   | 0.14            | 1.29 (0.78-2.13) | 0.32            | 1.54 (0.97-2.44) | 0.07            |
|                                                       | Non-ICUAC | 1.20 (0.56-2.56)   | 0.64            | 1.20 (0.69-2.09) | 0.51            | 1.18 (0.72-1.94) | 0.52            |
| Male                                                  | ICUAC     | 0.71 (0.40-1.27)   | 0.25            | 0.87 (0.54-1.39) | 0.56            | 0.97 (0.63-1.50) | 0.89            |
|                                                       | Non-ICUAC | 1.97 (0.89-4.36)   | 0.09            | 1.17 (0.68-2.01) | 0.57            | 1.19 (0.73-1.94) | 0.50            |
| Community onset                                       | ICUAC     | -                  | -               | -                | -               | -                | -               |
|                                                       | Non-ICUAC | 0.28 (0.04-2.08)   | 0.22            | 0.79 (0.31-1.98) | 0.61            | 0.79 (0.34-1.83) | 0.58            |
| Diabetes mellitus                                     | ICUAC     | 1.30 (0.71-2.36)   | 0.39            | 1.08 (0.66-1.78) | 0.76            | 1.20 (0.77-1.87) | 0.42            |
|                                                       | Non-ICUAC | 1.13 (0.51-2.51)   | 0.76            | 1.14 (0.64-2.04) | 0.65            | 1.06 (0.62-1.80) | 0.83            |
| Liver disease                                         | ICUAC     | 1.39 (0.69-2.81)   | 0.35            | 1.59 (0.91-2.78) | 0.10            | 1.64 (0.98-2.74) | 0.06            |
|                                                       | Non-ICUAC | 2.04 (0.83-5.03)   | 0.12            | 1.61 (0.79-3.31) | 0.19            | 1.48 (0.76-2.91) | 0.25            |
| Chronic kidney disease                                | ICUAC     | 1.53 (0.74-3.17)   | 0.25            | 1.38 (0.75-2.52) | 0.30            | 1.48 (0.86-2.56) | 0.16            |
|                                                       | Non-ICUAC | 0.52 (0.12-2.17)   | 0.37            | 1.00 (0.45-2.21) | 1.00            | 1.16 (0.59-2.29) | 0.66            |
| Chronic obstructive pulmonary disease                 | ICUAC     | 2.51 (1.25-5.07)   | 0.01            | 2.09 (1.15-3.83) | 0.02            | 2.29 (1.33-3.95) | 0.003           |
|                                                       | Non-ICUAC | 1.00 (0.24-4.20)   | 1.00            | 1.60 (0.69-3.75) | 0.28            | 1.48 (0.67-3.24) | 0.33            |
| Congestive heart failure                              | ICUAC     | 1.18 (0.42-3.29)   | 0.75            | 0.72 (0.26-1.97) | 0.52            | 1.04 (0.48-2.26) | 0.91            |
|                                                       | Non-ICUAC | 0.05 (0.00-121.59) | 0.44            | 1.25 (0.39-3.99) | 0.71            | 1.08 (0.34-3.43) | 0.90            |
| Myocardial infarction                                 | ICUAC     | 0.05 (0.00-17.77)  | 0.31            | 0.25 (0.03-1.80) | 0.17            | 0.37 (0.09-1.49) | 0.16            |
|                                                       | Non-ICUAC | 0.05 (0.00-404.81) | 0.51            | 1.07 (0.26-4.39) | 0.93            | 1.42 (0.44-4.52) | 0.56            |
| Cerebro-vascular disease or transient ischemic attack | ICUAC     | 0.93 (0.44-2.00)   | 0.86            | 1.02 (0.56-1.86) | 0.96            | 1.05 (0.61-1.81) | 0.86            |
|                                                       | Non-ICUAC | 0.51 (0.07-3.78)   | 0.51            | 0.24 (0.03-1.74) | 0.16            | 0.57 (0.18-1.81) | 0.34            |
| Dementia                                              | ICUAC     | 1.40 (0.59-3.31)   | 0.44            | 1.24 (0.59-2.59) | 0.57            | 1.38 (0.71-2.68) | 0.34            |
|                                                       | Non-ICUAC | 1.07 (0.15-7.89)   | 0.95            | 0.52 (0.07-3.78) | 0.52            | 0.41 (0.06-2.95) | 0.38            |
| Solid tumor                                           | ICUAC     | 1.52 (0.84-2.77)   | 0.17            | 1.14 (0.68-1.90) | 0.62            | 1.34 (0.85-2.11) | 0.20            |
|                                                       | Non-ICUAC | 1.58 (0.70-3.59)   | 0.27            | 1.47 (0.83-2.62) | 0.19            | 1.42 (0.84-2.39) | 0.19            |

|                            |           |                    |        |                   |        |                  |        |
|----------------------------|-----------|--------------------|--------|-------------------|--------|------------------|--------|
| Hematologic malignancies   | ICUAC     | 1.90 (0.81-4.49)   | 0.14   | 1.42 (0.65-3.09)  | 0.38   | 1.14 (0.52-2.47) | 0.74   |
|                            | Non-ICUAC | 0.84 (0.11-6.19)   | 0.86   | 0.44 (0.06-3.19)  | 0.42   | 0.36 (0.05-2.58) | 0.31   |
| ACCI more than 5           | ICUAC     | 1.63 (0.88-3.02)   | 0.12   | 1.23 (0.76-1.99)  | 0.39   | 1.40 (0.90-2.17) | 0.14   |
|                            | Non-ICUAC | 1.20 (0.54-2.65)   | 0.65   | 1.27 (0.71-2.27)  | 0.41   | 1.20 (0.71-2.03) | 0.49   |
| Severe sepsis              | ICUAC     | 1.89 (1.06-3.37)   | 0.03   | 2.26 (1.41-3.63)  | 0.001  | 2.56 (1.66-3.95) | <0.001 |
|                            | Non-ICUAC | 2.34 (1.06-5.17)   | 0.04   | 2.63 (1.47-4.68)  | 0.001  | 2.74 (1.62-4.62) | <0.001 |
| Bacteremia                 | ICUAC     | 1.08 (0.57-2.05)   | 0.82   | 0.96 (0.56-1.64)  | 0.88   | 1.00 (0.62-1.61) | 0.99   |
|                            | Non-ICUAC | 0.96 (0.33-2.78)   | 0.95   | 1.91 (1.02-3.57)  | 0.04   | 1.87 (1.05-3.34) | 0.03   |
| Total parenteral nutrition | ICUAC     | 1.00 (0.56-1.78)   | 0.99   | 0.93 (0.58-1.49)  | 0.76   | 1.13 (0.74-1.73) | 0.57   |
|                            | Non-ICUAC | 1.23 (0.59-2.59)   | 0.58   | 1.83 (1.07-3.15)  | 0.03   | 1.73 (1.06-2.84) | 0.03   |
| Prior surgery              | ICUAC     | 0.44 (0.18-1.03)   | 0.06   | 0.67 (0.37-1.21)  | 0.19   | 0.74 (0.44-1.23) | 0.25   |
|                            | Non-ICUAC | 0.19 (0.03-1.41)   | 0.11   | 0.63 (0.27-1.47)  | 0.28   | 0.52 (0.22-1.20) | 0.13   |
| Neutropenia                | ICUAC     | 1.55 (0.61-3.93)   | 0.35   | 1.27 (0.55-2.92)  | 0.58   | 1.27 (0.59-2.76) | 0.54   |
|                            | Non-ICUAC | 1.06 (0.37-3.05)   | 0.92   | 1.49 (0.75-2.97)  | 0.25   | 1.37 (0.72-2.63) | 0.34   |
| Immunosuppressive therapy  | ICUAC     | 0.74 (0.18-3.05)   | 0.68   | 1.31 (0.53-3.26)  | 0.56   | 1.09 (0.44-2.70) | 0.85   |
|                            | Non-ICUAC | 0.36 (0.05-2.63)   | 0.31   | 0.72 (0.26-1.98)  | 0.52   | 0.56 (0.20-1.54) | 0.26   |
| Urine catheter placement   | ICUAC     | 2.89 (1.23-6.83)   | 0.02   | 3.07 (1.52-6.18)  | 0.002  | 4.10 (2.11-7.96) | <0.001 |
|                            | Non-ICUAC | 1.66 (0.79-3.48)   | 0.18   | 1.95 (1.13-3.34)  | 0.02   | 1.94 (1.19-3.17) | 0.008  |
| CVC placement              | ICUAC     | 2.90 (1.23-6.85)   | 0.02   | 3.00 (1.53-5.86)  | 0.001  | 3.12 (1.72-5.65) | <0.001 |
|                            | Non-ICUAC | 1.74 (0.81-3.78)   | 0.16   | 1.51 (0.87-2.62)  | 0.14   | 1.63 (0.98-2.70) | 0.06   |
| Prior fungal therapy       | ICUAC     | 1.34 (0.48-3.73)   | 0.58   | 1.61 (0.74-3.53)  | 0.23   | 1.64 (0.79-3.40) | 0.19   |
|                            | Non-ICUAC | 0.05 (0.00-53.37)  | 0.39   | 0.28 (0.04-2.03)  | 0.21   | 0.21 (0.03-1.50) | 0.12   |
| CVC removal                | ICUAC     | 0.42 (0.19-0.91)   | 0.03   | 0.43 (0.23-0.80)  | 0.008  | 0.39 (0.22-0.69) | 0.001  |
|                            | Non-ICUAC | 0.33 (0.10-1.16)   | 0.08   | 0.46 (0.20-1.08)  | 0.07   | 0.35 (0.16-0.80) | 0.01   |
| Azole monotherapy          | ICUAC     | 0.11 (0.03-0.36)   | <0.001 | 0.29 (0.15-0.54)  | <0.001 | 0.37 (0.22-0.62) | <0.001 |
|                            | Non-ICUAC | 0.14 (0.04-0.48)   | 0.002  | 0.44 (0.24-0.80)  | 0.007  | 0.49 (0.29-0.83) | 0.009  |
| Non-azole therapy          | ICUAC     | 0.13 (0.04-0.41)   | 0.001  | 0.42 (0.23-0.76)  | 0.004  | 0.55 (0.33-0.90) | 0.02   |
|                            | Non-ICUAC | 0.20 (0.05-0.84)   | 0.03   | 0.64 (0.33-1.24)  | 0.19   | 0.77 (0.43-1.37) | 0.37   |
| Lack of antifungal therapy | ICUAC     | 20.20 (8.49-48.08) | <0.001 | 7.15 (4.32-11.84) | <0.001 | 5.47 (3.50-8.55) | <0.001 |

|                           |               |                                |        |                       |        |                       |            |
|---------------------------|---------------|--------------------------------|--------|-----------------------|--------|-----------------------|------------|
| Fluconazole<br>resistance | Non-<br>ICUAC | 12.98 (4.92-<br>34.24)         | <0.001 | 3.37 (1.96-5.80)      | <0.001 | 2.73 (1.66-4.48)      | <0.00<br>1 |
|                           | ICUAC         | -                              | -      | -                     | -      | -                     | -          |
| Micafungin<br>resistance  | Non-<br>ICUAC | 0.05 (0.00-<br>174,675,229.90) | 0.79   | 5.12 (0.70-<br>37.48) | 0.11   | 5.12 (0.70-<br>37.48) | 0.11       |
|                           | ICUAC         | -                              | -      | -                     | -      | -                     | -          |
|                           | Non-<br>ICUAC | -                              | -      | -                     | -      | -                     | -          |

---

Abbreviations: ICUAC, intensive care unit associated candidemia; OR, odds ratio; 95% CI, 95% confidence interval; ACCI, age-adjusted Charlson comorbidity index; CVC, central venous catheter.

**Supplementary Table S2B. Univariate analysis of predictive factors related to 7-, 30- and 90-day mortalities of ICUAC and non-ICUAC due to *Candida tropicalis***

| Variables                                             | Setting   | 7-day mortality   |                 | 30-day mortality |                 | 90-day mortality |                 |
|-------------------------------------------------------|-----------|-------------------|-----------------|------------------|-----------------|------------------|-----------------|
|                                                       |           | OR (95% CI)       | <i>p</i> -Value | OR (95% CI)      | <i>p</i> -Value | OR (95% CI)      | <i>p</i> -Value |
| Aged 65 or older                                      | ICUAC     | 1.31 (0.65-2.64)  | 0.46            | 1.81 (1.02-3.21) | 0.04            | 1.66 (0.99-2.80) | 0.06            |
|                                                       | Non-ICUAC | 1.12 (0.40-3.15)  | 0.83            | 0.74 (0.32-1.71) | 0.49            | 0.68 (0.32-1.45) | 0.32            |
| Male                                                  | ICUAC     | 1.04 (0.51-2.12)  | 0.92            | 1.05 (0.59-1.87) | 0.87            | 1.10 (0.65-1.86) | 0.73            |
|                                                       | Non-ICUAC | 1.24 (0.42-3.64)  | 0.69            | 1.11 (0.47-2.65) | 0.81            | 1.09 (0.50-2.37) | 0.84            |
| Community onset                                       | ICUAC     | -                 | -               | -                | -               | -                | -               |
|                                                       | Non-ICUAC | 1.53 (0.35-6.82)  | 0.57            | 0.98 (0.23-4.21) | 0.98            | 0.82 (0.19-3.48) | 0.79            |
| Diabetes mellitus                                     | ICUAC     | 1.01 (0.45-2.27)  | 0.97            | 1.61 (0.89-2.92) | 0.11            | 1.39 (0.79-2.45) | 0.26            |
|                                                       | Non-ICUAC | 0.55 (0.16-1.95)  | 0.36            | 0.47 (0.16-1.38) | 0.17            | 0.36 (0.13-1.06) | 0.06            |
| Liver disease                                         | ICUAC     | 1.73 (0.79-3.76)  | 0.17            | 1.86 (0.99-3.46) | 0.05            | 2.13 (1.20-3.78) | 0.01            |
|                                                       | Non-ICUAC | 0.70 (0.16-3.11)  | 0.64            | 1.05 (0.36-3.11) | 0.93            | 0.90 (0.31-2.61) | 0.85            |
| Chronic kidney disease                                | ICUAC     | 0.91 (0.37-2.21)  | 0.83            | 1.57 (0.83-2.98) | 0.17            | 1.65 (0.91-3.00) | 0.10            |
|                                                       | Non-ICUAC | 0.99 (0.22-4.38)  | 0.99            | 1.35 (0.46-3.99) | 0.59            | 1.18 (0.41-3.44) | 0.76            |
| Chronic obstructive pulmonary disease                 | ICUAC     | 0.88 (0.27-2.88)  | 0.83            | 0.89 (0.35-2.26) | 0.81            | 1.11 (0.50-2.44) | 0.80            |
|                                                       | Non-ICUAC | 1.80 (0.41-8.01)  | 0.44            | 1.21 (0.28-5.18) | 0.80            | 1.08 (0.26-4.59) | 0.91            |
| Congestive heart failure                              | ICUAC     | 2.54 (0.88-7.27)  | 0.08            | 3.34 (1.49-7.52) | 0.003           | 3.38 (1.50-7.59) | 0.003           |
|                                                       | Non-ICUAC | 0.98 (0.13-7.42)  | 0.98            | 1.42 (0.33-6.08) | 0.64            | 1.12 (0.26-4.72) | 0.88            |
| Myocardial infarction                                 | ICUAC     | 1.75 (0.61-5.00)  | 0.30            | 1.65 (0.70-3.89) | 0.25            | 1.40 (0.60-3.26) | 0.44            |
|                                                       | Non-ICUAC | 0.98 (0.13-7.42)  | 0.98            | 0.64 (0.09-4.76) | 0.66            | 0.51 (0.07-3.79) | 0.51            |
| Cerebro-vascular disease or transient ischemic attack | ICUAC     | 0.36 (0.05-2.61)  | 0.31            | 0.41 (0.10-1.70) | 0.22            | 0.52 (0.16-1.66) | 0.27            |
|                                                       | Non-ICUAC | 0.87 (0.20-3.87)  | 0.86            | 0.88 (0.26-2.99) | 0.84            | 0.91 (0.31-2.64) | 0.87            |
| Dementia                                              | ICUAC     | 0.48 (0.07-3.54)  | 0.47            | 1.41 (0.50-3.92) | 0.52            | 1.23 (0.44-3.40) | 0.69            |
|                                                       | Non-ICUAC | 1.68 (0.22-12.81) | 0.62            | 1.06 (0.14-7.90) | 0.95            | 0.76 (0.10-5.62) | 0.79            |
| Solid tumor                                           | ICUAC     | 0.59 (0.24-1.45)  | 0.25            | 0.84 (0.44-1.62) | 0.60            | 0.90 (0.50-1.62) | 0.73            |
|                                                       | Non-ICUAC | 1.12 (0.40-3.14)  | 0.83            | 0.95 (0.40-2.26) | 0.91            | 1.01 (0.46-2.21) | 0.97            |

|                            |           |                    |       |                  |       |                  |       |
|----------------------------|-----------|--------------------|-------|------------------|-------|------------------|-------|
| Hematologic malignancies   | ICUAC     | 1.36 (0.52-3.56)   | 0.53  | 1.27 (0.57-2.84) | 0.56  | 1.27 (0.60-2.69) | 0.53  |
|                            | Non-ICUAC | 0.90 (0.20-4.00)   | 0.89  | 1.32 (0.45-3.89) | 0.62  | 1.37 (0.52-3.62) | 0.53  |
| ACCI more than 5           | ICUAC     | 1.29 (0.63-2.66)   | 0.49  | 1.82 (1.00-3.33) | 0.05  | 2.21 (1.26-3.87) | 0.006 |
|                            | Non-ICUAC | 1.10 (0.39-3.09)   | 0.86  | 1.03 (0.44-2.41) | 0.95  | 0.92 (0.43-1.96) | 0.83  |
| Severe sepsis              | ICUAC     | 2.81 (1.32-5.97)   | 0.007 | 3.10 (1.69-5.67) | 0.000 | 3.24 (1.88-5.60) | 0.000 |
|                            | Non-ICUAC | 1.96 (0.67-5.75)   | 0.22  | 1.51 (0.59-3.86) | 0.39  | 1.92 (0.83-4.41) | 0.13  |
| Bacteremia                 | ICUAC     | 1.05 (0.45-2.43)   | 0.92  | 1.28 (0.67-2.46) | 0.46  | 1.50 (0.83-2.72) | 0.18  |
|                            | Non-ICUAC | 1.03 (0.33-3.24)   | 0.96  | 0.83 (0.31-2.26) | 0.72  | 1.21 (0.53-2.76) | 0.65  |
| Total parenteral nutrition | ICUAC     | 0.99 (0.48-2.01)   | 0.97  | 0.89 (0.50-1.57) | 0.68  | 0.93 (0.56-1.57) | 0.80  |
|                            | Non-ICUAC | 1.40 (0.51-3.85)   | 0.52  | 1.43 (0.62-3.30) | 0.41  | 1.54 (0.72-3.30) | 0.26  |
| Prior surgery              | ICUAC     | 0.82 (0.34-1.99)   | 0.66  | 0.85 (0.42-1.71) | 0.65  | 0.79 (0.42-1.49) | 0.46  |
|                            | Non-ICUAC | 0.79 (0.18-3.49)   | 0.75  | 0.80 (0.24-2.69) | 0.72  | 0.81 (0.28-2.35) | 0.70  |
| Neutropenia                | ICUAC     | 1.93 (0.74-5.04)   | 0.18  | 2.11 (0.94-4.73) | 0.07  | 2.45 (1.14-5.26) | 0.02  |
|                            | Non-ICUAC | 0.93 (0.21-4.13)   | 0.93  | 1.88 (0.69-5.11) | 0.21  | 1.65 (0.62-4.40) | 0.32  |
| Immunosuppressive therapy  | ICUAC     | 0.45 (0.06-3.31)   | 0.43  | 0.89 (0.28-2.87) | 0.85  | 0.73 (0.23-2.35) | 0.60  |
|                            | Non-ICUAC | 0.87 (0.11-6.58)   | 0.89  | 1.22 (0.29-5.23) | 0.79  | 0.94 (0.22-3.97) | 0.93  |
| Urine catheter placement   | ICUAC     | 2.59 (0.99-6.74)   | 0.05  | 2.21 (1.07-4.57) | 0.03  | 3.13 (1.54-6.39) | 0.002 |
|                            | Non-ICUAC | 2.65 (0.94-7.46)   | 0.07  | 2.79 (1.19-6.54) | 0.02  | 2.59 (1.21-5.57) | 0.01  |
| CVC placement              | ICUAC     | 1.92 (0.86-4.30)   | 0.11  | 1.56 (0.85-2.88) | 0.15  | 1.59 (0.91-2.78) | 0.10  |
|                            | Non-ICUAC | 1.40 (0.51-3.85)   | 0.52  | 1.55 (0.67-3.58) | 0.31  | 1.68 (0.78-3.58) | 0.18  |
| Prior fungal therapy       | ICUAC     | 0.69 (0.09-5.03)   | 0.71  | 0.35 (0.05-2.53) | 0.30  | 0.52 (0.13-2.13) | 0.36  |
|                            | Non-ICUAC | 0.04 (0.00-319.64) | 0.49  | 0.80 (0.11-5.98) | 0.83  | 0.72 (0.10-5.32) | 0.75  |
| CVC removal                | ICUAC     | 0.29 (0.07-1.25)   | 0.10  | 0.59 (0.24-1.45) | 0.26  | 0.57 (0.25-1.30) | 0.18  |
|                            | Non-ICUAC | 0.77 (0.18-3.24)   | 0.73  | 0.95 (0.30-2.99) | 0.93  | 0.88 (0.31-2.47) | 0.81  |
| Azole monotherapy          | ICUAC     | 0.22 (0.05-0.92)   | 0.04  | 0.32 (0.13-0.82) | 0.02  | 0.35 (0.16-0.78) | 0.01  |
|                            | Non-ICUAC | 0.55 (0.15-1.94)   | 0.35  | 0.99 (0.40-2.44) | 0.99  | 0.72 (0.30-1.69) | 0.45  |
| Non-azole therapy          | ICUAC     | 0.33 (0.15-0.75)   | 0.008 | 0.61 (0.34-1.08) | 0.09  | 0.71 (0.42-1.20) | 0.20  |
|                            | Non-ICUAC | 0.28 (0.08-0.99)   | 0.05  | 0.32 (0.12-0.86) | 0.02  | 0.55 (0.25-1.22) | 0.14  |
| Lack of antifungal therapy | ICUAC     | 6.54 (3.05-14.04)  | 0.000 | 3.79 (2.13-6.76) | 0.000 | 3.25 (1.92-5.51) | 0.000 |

|                           |               |                              |       |                           |       |                           |       |
|---------------------------|---------------|------------------------------|-------|---------------------------|-------|---------------------------|-------|
| Fluconazole<br>resistance | Non-<br>ICUAC | 5.69 (2.00-<br>16.20)        | 0.001 | 3.40 (1.45-7.94)          | 0.005 | 2.89 (1.33-6.28)          | 0.007 |
|                           | ICUAC         | 3.29 (0.44-<br>24.43)        | 0.24  | 3.29 (0.44-<br>24.43)     | 0.24  | 3.29 (0.44-<br>24.43)     | 0.24  |
| Micafungin<br>resistance  | Non-<br>ICUAC | 0.05 (0.00-<br>1,318,766.81) | 0.73  | 0.05 (0.00-<br>33,105.24) | 0.66  | 1.92 (0.26-<br>14.23)     | 0.52  |
|                           | ICUAC         | -                            | -     | -                         | -     | -                         | -     |
|                           | Non-<br>ICUAC | 0.05 (0.00-<br>1,318,766.81) | 0.73  | 0.05 (0.00-<br>33,105.24) | 0.66  | 0.05 (0.00-<br>33,105.24) | 0.66  |

---

Abbreviations: ICUAC, intensive care unit associated candidemia; OR, odds ratio; 95% CI, 95% confidence interval; ACCI, age-adjusted Charlson comorbidity index; CVC, central venous catheter.

**Supplementary Table S2C. Univariate analysis of predictive factors related to 7-, 30- and 90-day mortalities of ICUAC and non-ICUAC due to *Candida glabrata***

| Variables                                             | Setting   | 7-day mortality               |                 | 30-day mortality       |                 | 90-day mortality      |                 |
|-------------------------------------------------------|-----------|-------------------------------|-----------------|------------------------|-----------------|-----------------------|-----------------|
|                                                       |           | OR (95% CI)                   | <i>p</i> -Value | OR (95% CI)            | <i>p</i> -Value | OR (95% CI)           | <i>p</i> -Value |
| Aged 65 or older                                      | ICUAC     | 5.23 (1.21-22.70)             | 0.03            | 2.76 (1.12-6.82)       | 0.03            | 2.12 (0.98-4.61)      | 0.06            |
|                                                       | Non-ICUAC | 0.47 (0.13-1.77)              | 0.27            | 0.42 (0.18-0.98)       | 0.05            | 0.63 (0.29-1.37)      | 0.25            |
| Male                                                  | ICUAC     | 0.61 (0.25-1.49)              | 0.28            | 0.55 (0.26-1.14)       | 0.11            | 0.53 (0.27-1.05)      | 0.07            |
|                                                       | Non-ICUAC | 3.62 (0.75-17.44)             | 0.11            | 2.27 (0.93-5.57)       | 0.07            | 2.31 (1.05-5.11)      | 0.04            |
| Community onset                                       | ICUAC     | -                             | -               | -                      | -               | -                     | -               |
|                                                       | Non-ICUAC | 0.03 (0.00-22.17)             | 0.30            | 0.63 (0.21-1.85)       | 0.40            | 0.76 (0.31-1.87)      | 0.55            |
| Diabetes mellitus                                     | ICUAC     | 1.14 (0.43-3.00)              | 0.79            | 0.86 (0.37-2.01)       | 0.73            | 0.89 (0.41-1.92)      | 0.77            |
|                                                       | Non-ICUAC | 2.56 (0.69-9.53)              | 0.16            | 0.92 (0.37-2.25)       | 0.85            | 1.25 (0.58-2.67)      | 0.57            |
| Liver disease                                         | ICUAC     | 2.83 (1.01-7.90)              | 0.05            | 2.24 (0.91-5.53)       | 0.08            | 1.91 (0.78-4.63)      | 0.15            |
|                                                       | Non-ICUAC | 0.88 (0.11-7.00)              | 0.90            | 1.59 (0.54-4.71)       | 0.40            | 1.56 (0.59-4.10)      | 0.37            |
| Chronic kidney disease                                | ICUAC     | 2.76 (1.08-7.05)              | 0.03            | 2.04 (0.90-4.63)       | 0.09            | 1.91 (0.88-4.11)      | 0.10            |
|                                                       | Non-ICUAC | 2.41 (0.50-11.61)             | 0.27            | 0.77 (0.18-3.29)       | 0.72            | 1.19 (0.41-3.43)      | 0.75            |
| Chronic obstructive pulmonary disease                 | ICUAC     | 1.49 (0.49-4.48)              | 0.48            | 1.57 (0.64-3.86)       | 0.33            | 1.38 (0.57-3.34)      | 0.48            |
|                                                       | Non-ICUAC | 1.50 (0.19-11.98)             | 0.70            | 1.13 (0.26-4.82)       | 0.87            | 1.80 (0.62-5.20)      | 0.28            |
| Congestive heart failure                              | ICUAC     | 0.49 (0.07-3.68)              | 0.49            | 1.11 (0.33-3.66)       | 0.87            | 1.18 (0.42-3.36)      | 0.75            |
|                                                       | Non-ICUAC | 0.05 (0.00-22,269,423,208.21) | 0.83            | 0.05 (0.00-419,209.60) | 0.71            | 0.05 (0.00-28,844.78) | 0.66            |
| Myocardial infarction                                 | ICUAC     | 1.34 (0.31-5.80)              | 0.70            | 1.40 (0.42-4.65)       | 0.58            | 1.15 (0.35-3.78)      | 0.82            |
|                                                       | Non-ICUAC | 6.31 (1.30-30.51)             | 0.02            | 2.14 (0.50-9.15)       | 0.31            | 1.47 (0.35-6.22)      | 0.60            |
| Cerebro-vascular disease or transient ischemic attack | ICUAC     | 1.45 (0.55-3.81)              | 0.45            | 1.51 (0.69-3.32)       | 0.31            | 1.23 (0.57-2.64)      | 0.60            |
|                                                       | Non-ICUAC | 0.04 (0.00-735.11)            | 0.53            | 0.94 (0.22-4.01)       | 0.93            | 1.58 (0.55-4.55)      | 0.40            |
| Dementia                                              | ICUAC     | 1.45 (0.34-6.29)              | 0.62            | 1.74 (0.52-5.77)       | 0.37            | 1.17 (0.36-3.83)      | 0.80            |
|                                                       | Non-ICUAC | 2.35 (0.29-18.82)             | 0.42            | 2.35 (0.55-10.08)      | 0.25            | 0                     | 0.08            |
| Solid tumor                                           | ICUAC     | 2.96 (1.19-7.40)              | 0.02            | 2.02 (0.92-4.46)       | 0.08            | 1.66 (0.77-3.58)      | 0.20            |

|                            |           |                      |      |                   |       |                  |       |
|----------------------------|-----------|----------------------|------|-------------------|-------|------------------|-------|
|                            | Non-ICUAC | 1.00 (0.27-3.72)     | 1.00 | 1.07 (0.46-2.51)  | 0.87  | 1.10 (0.52-2.36) | 0.80  |
| Hematologic malignancies   | ICUAC     | 0.88 (0.12-6.61)     | 0.90 | 1.27 (0.30-5.37)  | 0.74  | 1.99 (0.60-6.56) | 0.26  |
|                            | Non-ICUAC | 1.65 (0.21-13.18)    | 0.64 | 3.15 (1.06-9.34)  | 0.04  | 2.55 (0.88-7.37) | 0.08  |
| ACCI more than 5           | ICUAC     | 2.84 (1.02-7.91)     | 0.05 | 1.83 (0.86-3.90)  | 0.12  | 1.40 (0.70-2.81) | 0.34  |
|                            | Non-ICUAC | 1.60 (0.33-7.71)     | 0.56 | 1.09 (0.43-2.80)  | 0.85  | 0.96 (0.42-2.20) | 0.93  |
| Severe sepsis              | ICUAC     | 1.50 (0.60-3.74)     | 0.38 | 1.33 (0.63-2.79)  | 0.45  | 1.79 (0.90-3.57) | 0.10  |
|                            | Non-ICUAC | 1.93 (0.48-7.70)     | 0.35 | 2.25 (0.94-5.36)  | 0.07  | 2.69 (1.26-5.74) | 0.01  |
| Bacteremia                 | ICUAC     | 1.56 (0.63-3.87)     | 0.34 | 1.61 (0.77-3.37)  | 0.21  | 1.53 (0.76-3.09) | 0.23  |
|                            | Non-ICUAC | 1.46 (0.30-7.04)     | 0.64 | 2.53 (1.03-6.21)  | 0.04  | 2.97 (1.37-6.45) | 0.006 |
| Total parenteral nutrition | ICUAC     | 1.08 (0.43-2.69)     | 0.87 | 0.95 (0.45-2.02)  | 0.90  | 1.04 (0.52-2.08) | 0.91  |
|                            | Non-ICUAC | 4.19 (1.05-16.77)    | 0.04 | 2.81 (1.21-6.50)  | 0.02  | 2.45 (1.17-5.15) | 0.02  |
| Prior surgery              | ICUAC     | 0.79 (0.26-2.38)     | 0.67 | 0.91 (0.39-2.13)  | 0.83  | 1.12 (0.52-2.41) | 0.78  |
|                            | Non-ICUAC | 0.04 (0.00-271.15)   | 0.48 | 1.12 (0.33-3.80)  | 0.85  | 0.85 (0.26-2.83) | 0.80  |
| Neutropenia                | ICUAC     | 0.05 (0.00-961.68)   | 0.55 | 0.61 (0.08-4.53)  | 0.63  | 0.59 (0.08-4.36) | 0.61  |
|                            | Non-ICUAC | 1.05 (0.13-8.39)     | 0.96 | 1.53 (0.45-5.18)  | 0.49  | 1.78 (0.61-5.14) | 0.29  |
| Immunosuppressive therapy  | ICUAC     | -                    | -    | -                 | -     | -                | -     |
|                            | Non-ICUAC | 2.17 (0.27-17.39)    | 0.46 | 1.69 (0.40-7.24)  | 0.48  | 1.24 (0.29-5.23) | 0.77  |
| Urine catheter placement   | ICUAC     | 3.42 (0.79-14.82)    | 0.10 | 4.40 (1.32-14.65) | 0.02  | 3.07 (1.17-8.01) | 0.02  |
|                            | Non-ICUAC | 1.36 (0.37-5.08)     | 0.64 | 1.19 (0.51-2.78)  | 0.69  | 1.57 (0.75-3.31) | 0.23  |
| CVC placement              | ICUAC     | 2.24 (0.65-7.68)     | 0.20 | 1.38 (0.59-3.24)  | 0.46  | 1.41 (0.64-3.13) | 0.40  |
|                            | Non-ICUAC | 2.16 (0.54-8.62)     | 0.28 | 1.89 (0.79-4.50)  | 0.15  | 1.36 (0.64-2.88) | 0.42  |
| Prior fungal therapy       | ICUAC     | 1.18 (0.16-8.83)     | 0.87 | 0.57 (0.08-4.21)  | 0.58  | 0.49 (0.07-3.64) | 0.49  |
|                            | Non-ICUAC | 1.65 (0.21-13.18)    | 0.64 | 1.53 (0.36-6.54)  | 0.57  | 1.96 (0.59-6.51) | 0.27  |
| CVC removal                | ICUAC     | 0.23 (0.03-1.78)     | 0.16 | 0.50 (0.15-1.70)  | 0.27  | 0.78 (0.29-2.09) | 0.62  |
|                            | Non-ICUAC | 0.03 (0.00-1,101.52) | 0.53 | 0.75 (0.16-3.42)  | 0.71  | 1.04 (0.29-3.74) | 0.95  |
| Azole monotherapy          | ICUAC     | 0.04 (0.00-9.59)     | 0.25 | 0.62 (0.19-2.05)  | 0.43  | 0.56 (0.17-1.84) | 0.34  |
|                            | Non-ICUAC | 0.04 (0.00-271.15)   | 0.48 | 0.79 (0.18-3.39)  | 0.75  | 0.61 (0.14-2.56) | 0.50  |
| Non-azole therapy          | ICUAC     | 0.08 (0.01-0.62)     | 0.02 | 0.27 (0.10-0.71)  | 0.008 | 0.45 (0.21-0.97) | 0.04  |
|                            | Non-ICUAC | 0.01 (0.00-2.47)     | 0.10 | 0.49 (0.21-1.13)  | 0.10  | 0.70 (0.33-1.48) | 0.35  |



|                            |           |                               |       |                      |       |                      |       |
|----------------------------|-----------|-------------------------------|-------|----------------------|-------|----------------------|-------|
| Lack of antifungal therapy | ICUAC     | 22.82 (3.03-171.75)           | 0.002 | 3.90 (1.71-8.89)     | 0.001 | 2.74 (1.33-5.62)     | 0.006 |
|                            | Non-ICUAC | 289.97 (0.27-310,796.47)      | 0.11  | 2.40 (1.04-5.57)     | 0.04  | 1.79 (0.84-3.83)     | 0.13  |
| Fluconazole resistance     | ICUAC     | 2.44 (0.70-8.43)              | 0.16  | 3.58 (1.34-9.57)     | 0.01  | 3.58 (1.34-9.57)     | 0.01  |
|                            | Non-ICUAC | 2.56 (0.32-20.50)             | 0.38  | 0.99 (0.13-7.35)     | 0.99  | 1.47 (0.35-6.21)     | 0.60  |
| Micafungin resistance      | ICUAC     | 0.05 (0.00-55,430.22)         | 0.67  | 0.05 (0.00-3,684.65) | 0.60  | 0.05 (0.00-5,279.06) | 0.61  |
|                            | Non-ICUAC | 0.05 (0.00-22,269,423,208.21) | 0.83  | 3.84 (0.51-28.72)    | 0.19  | 3.84 (0.51-28.72)    | 0.19  |

---

Abbreviations: ICUAC, intensive care unit associated candidemia; OR, odds ratio; 95% CI, 95% confidence interval; ACCI, age-adjusted Charlson comorbidity index; CVC, central venous catheter.

**Supplementary Table S2D. Univariate analysis of predictive factors related to 7-, 30- and 90-day mortalities of candidemia patients due to *Candida parapsilosis***

| Variables                                             | Setting   | 7-day mortality              |                 | 30-day mortality     |                 | 90-day mortality     |                 |
|-------------------------------------------------------|-----------|------------------------------|-----------------|----------------------|-----------------|----------------------|-----------------|
|                                                       |           | OR (95% CI)                  | <i>p</i> -Value | OR (95% CI)          | <i>p</i> -Value | OR (95% CI)          | <i>p</i> -Value |
| Aged 65 or older                                      | ICUAC     | 11.46 (1.45-90.62)           | 0.02            | 3.82 (1.36-10.75)    | 0.01            | 3.58 (1.37-9.37)     | 0.009           |
|                                                       | Non-ICUAC | 0.87 (0.12-6.19)             | 0.89            | 1.16 (0.26-5.17)     | 0.85            | 1.47 (0.35-6.16)     | 0.60            |
| Male                                                  | ICUAC     | 0.28 (0.08-1.01)             | 0.05            | 0.51 (0.20-1.29)     | 0.15            | 0.61 (0.25-1.50)     | 0.28            |
|                                                       | Non-ICUAC | 1.00 (0.10-9.61)             | 1.00            | 0.82 (0.16-4.23)     | 0.81            | 0.99 (0.20-4.93)     | 0.99            |
| Community onset                                       | ICUAC     | -                            | -               | -                    | -               | -                    | -               |
|                                                       | Non-ICUAC | 0.04 (0.00-5,311.54)         | 0.59            | 0.04 (0.00-233.28)   | 0.46            | 0.04 (0.00-115.29)   | 0.42            |
| Diabetes mellitus                                     | ICUAC     | 0.35 (0.04-2.74)             | 0.32            | 0.59 (0.17-2.02)     | 0.40            | 0.73 (0.24-2.17)     | 0.57            |
|                                                       | Non-ICUAC | 2.58 (0.36-18.31)            | 0.34            | 3.52 (0.79-15.75)    | 0.10            | 2.71 (0.68-10.84)    | 0.16            |
| Liver disease                                         | ICUAC     | 6.41 (0.79-52.13)            | 0.08            | 6.41 (0.79-52.13)    | 0.08            | 6.41 (0.79-52.13)    | 0.08            |
|                                                       | Non-ICUAC | 0.04 (0.00-165,482.07)       | 0.69            | 0.04 (0.00-3,361.80) | 0.58            | 0.04 (0.00-2,165.81) | 0.57            |
| Chronic kidney disease                                | ICUAC     | 0.74 (0.09-5.87)             | 0.78            | 0.37 (0.05-2.75)     | 0.33            | 0.68 (0.16-2.92)     | 0.60            |
|                                                       | Non-ICUAC | 0.04 (0.00-23,302.06)        | 0.64            | 1.19 (0.14-9.89)     | 0.87            | 1.04 (0.13-8.47)     | 0.97            |
| Chronic obstructive pulmonary disease                 | ICUAC     | 0.62 (0.08-4.88)             | 0.65            | 1.12 (0.32-3.86)     | 0.86            | 1.42 (0.48-4.26)     | 0.53            |
|                                                       | Non-ICUAC | 0.05 (0.00-1,370,187,406.67) | 0.80            | 4.91 (0.59-40.90)    | 0.14            | 4.91 (0.59-40.90)    | 0.14            |
| Congestive heart failure                              | ICUAC     | 0.04 (0.00-593.85)           | 0.52            | 0.53 (0.07-4.02)     | 0.54            | 1.02 (0.24-4.40)     | 0.98            |
|                                                       | Non-ICUAC | 0.05 (0.00-1,370,187,406.67) | 0.80            | 4.91 (0.59-40.90)    | 0.14            | 4.32 (0.53-35.20)    | 0.17            |
| Myocardial infarction                                 | ICUAC     | 3.19 (0.67-15.11)            | 0.14            | 1.74 (0.40-7.61)     | 0.46            | 1.54 (0.36-6.63)     | 0.57            |
|                                                       | Non-ICUAC | 5.75 (0.60-55.37)            | 0.13            | 2.80 (0.34-23.29)    | 0.34            | 2.28 (0.28-18.59)    | 0.44            |
| Cerebro-vascular disease or transient ischemic attack | ICUAC     | 0.39 (0.05-3.11)             | 0.38            | 0.39 (0.09-1.71)     | 0.21            | 0.77 (0.26-2.31)     | 0.64            |
|                                                       | Non-ICUAC | 0.04 (0.00-18,935.46)        | 0.63            | 1.20 (0.14-9.96)     | 0.87            | 1.08 (0.13-8.81)     | 0.94            |
| Dementia                                              | ICUAC     | 0.05 (0.00-6,017,280.36)     | 0.75            | 3.14 (0.41-24.04)    | 0.27            | 3.14 (0.41-24.04)    | 0.27            |

|                            |           |                                   |      |                              |      |                            |      |
|----------------------------|-----------|-----------------------------------|------|------------------------------|------|----------------------------|------|
|                            | Non-ICUAC | 0.05 (0.00-25,331,786,021,976.70) | 0.86 | 0.05 (0.00-3,174,566,202.89) | 0.81 | 0.05 (0.00-334,821,302.42) | 0.79 |
| Solid tumor                | ICUAC     | 2.20 (0.57-8.52)                  | 0.25 | 1.70 (0.56-5.19)             | 0.35 | 1.53 (0.51-4.60)           | 0.45 |
|                            | Non-ICUAC | 1.13 (0.16-8.02)                  | 0.90 | 0.85 (0.19-3.79)             | 0.83 | 1.13 (0.28-4.51)           | 0.86 |
| Hematologic malignancies   | ICUAC     | -                                 | -    | -                            | -    | -                          | -    |
|                            | Non-ICUAC | 0.05 (0.00-25,331,786,021,977.00) | 0.86 | 11.24 (1.31-96.25)           | 0.03 | 11.24 (1.31-96.25)         | 0.03 |
| ACCI more than 5           | ICUAC     | 1.45 (0.41-5.13)                  | 0.57 | 1.12 (0.42-3.00)             | 0.82 | 1.23 (0.49-3.09)           | 0.66 |
|                            | Non-ICUAC | 4.53 (0.47-43.58)                 | 0.19 | 3.87 (0.75-19.98)            | 0.11 | 4.95 (1.00-24.64)          | 0.05 |
| Severe sepsis              | ICUAC     | 3.18 (0.92-11.01)                 | 0.07 | 2.07 (0.80-5.35)             | 0.13 | 2.21 (0.90-5.43)           | 0.08 |
|                            | Non-ICUAC | 2.82 (0.29-27.09)                 | 0.37 | 6.67 (1.49-29.84)            | 0.01 | 6.13 (1.43-26.33)          | 0.02 |
| Bacteremia                 | ICUAC     | 0.04 (0.00-38.86)                 | 0.35 | 0.52 (0.12-2.27)             | 0.39 | 0.75 (0.22-2.57)           | 0.65 |
|                            | Non-ICUAC | 0.04 (0.00-1,350,428.16)          | 0.72 | 0.04 (0.00-14,151.00)        | 0.63 | 0.04 (0.00-4,543.68)       | 0.60 |
| Total parenteral nutrition | ICUAC     | 1.21 (0.35-4.18)                  | 0.77 | 1.20 (0.48-3.02)             | 0.70 | 1.22 (0.51-2.92)           | 0.66 |
|                            | Non-ICUAC | 1.46 (0.21-10.36)                 | 0.71 | 3.66 (0.71-18.89)            | 0.12 | 2.46 (0.59-10.28)          | 0.22 |
| Prior surgery              | ICUAC     | 0.74 (0.16-3.48)                  | 0.70 | 0.84 (0.28-2.55)             | 0.75 | 1.01 (0.36-2.77)           | 0.99 |
|                            | Non-ICUAC | 0.04 (0.00-63,689.70)             | 0.66 | 0.04 (0.00-1,480.28)         | 0.55 | 0.04 (0.00-662.96)         | 0.52 |
| Neutropenia                | ICUAC     | 1.67 (0.21-13.19)                 | 0.63 | 2.42 (0.55-10.64)            | 0.24 | 2.21 (0.51-9.62)           | 0.29 |
|                            | Non-ICUAC | 0.04 (0.00-63,689.70)             | 0.66 | 0.04 (0.00-1,480.28)         | 0.55 | 0.04 (0.00-662.96)         | 0.52 |
| Immunosuppressive therapy  | ICUAC     | -                                 | -    | -                            | -    | -                          | -    |
|                            | Non-ICUAC | 7.63 (0.79-73.79)                 | 0.08 | 3.95 (0.47-32.87)            | 0.20 | 3.26 (0.40-26.55)          | 0.27 |
| Urine catheter placement   | ICUAC     | 2.24 (0.48-10.57)                 | 0.31 | 3.20 (0.92-11.08)            | 0.07 | 3.77 (1.10-12.89)          | 0.04 |
|                            | Non-ICUAC | 0.46 (0.05-4.43)                  | 0.50 | 1.77 (0.40-7.92)             | 0.45 | 2.22 (0.53-9.31)           | 0.27 |
| CVC placement              | ICUAC     | 3.23 (0.69-15.21)                 | 0.14 | 2.35 (0.84-6.60)             | 0.11 | 2.80 (1.01-7.71)           | 0.05 |
|                            | Non-ICUAC | 0.26 (0.03-2.52)                  | 0.25 | 0.59 (0.13-2.61)             | 0.48 | 0.76 (0.19-3.05)           | 0.70 |
| Prior fungal therapy       | ICUAC     | 1.31 (0.17-10.38)                 | 0.80 | 0.65 (0.09-4.88)             | 0.68 | 0.56 (0.08-4.20)           | 0.57 |
|                            | Non-ICUAC | 29.50 (1.84-471.61)               | 0.02 | 29.50 (1.84-471.61)          | 0.02 | 29.50 (1.84-471.61)        | 0.02 |
| CVC removal                | ICUAC     | 0.18 (0.02-1.43)                  | 0.10 | 0.31 (0.08-1.13)             | 0.08 | 0.23 (0.07-0.84)           | 0.03 |
|                            | Non-ICUAC | 0.02 (0.00-232,409.72)            | 0.64 | 0.58 (0.05-6.47)             | 0.66 | 0.36 (0.04-3.52)           | 0.38 |
| Azole monotherapy          | ICUAC     | 0.02 (0.00-2.77)                  | 0.12 | 0.26 (0.09-0.80)             | 0.02 | 0.38 (0.15-0.99)           | 0.05 |

|                            |           |                            |      |                    |        |                    |        |
|----------------------------|-----------|----------------------------|------|--------------------|--------|--------------------|--------|
| Non-azole therapy          | Non-ICUAC | 0.27 (0.03-2.61)           | 0.26 | 0.60 (0.13-2.67)   | 0.50   | 0.78 (0.19-3.11)   | 0.72   |
|                            | ICUAC     | 0.03 (0.00-9.02)           | 0.23 | 0.44 (0.13-1.52)   | 0.20   | 0.39 (0.11-1.32)   | 0.13   |
| Lack of antifungal therapy | Non-ICUAC | 0.04 (0.00-4,604.24)       | 0.59 | 0.04 (0.00-220.03) | 0.46   | 0.04 (0.00-118.54) | 0.43   |
|                            | ICUAC     | 612.80 (0.18-2,062,854.44) | 0.12 | 9.23 (3.42-24.88)  | <0.001 | 7.64 (3.03-19.28)  | <0.001 |
| Fluconazole resistance     | Non-ICUAC | 7.29 (0.76-70.09)          | 0.09 | 3.46 (0.77-15.50)  | 0.11   | 2.71 (0.68-10.90)  | 0.16   |
|                            | ICUAC     | 0.04 (0.00-593.85)         | 0.52 | 0.62 (0.08-4.64)   | 0.64   | 0.56 (0.08-4.20)   | 0.57   |
| Micafungin resistance      | Non-ICUAC | -                          | -    | -                  | -      | -                  | -      |
|                            | ICUAC     | -                          | -    | -                  | -      | -                  | -      |
|                            | Non-ICUAC | -                          | -    | -                  | -      | -                  | -      |

Abbreviations: ICUAC, intensive care unit associated candidemia; OR, odds ratio; 95% CI, 95% confidence interval; ACCI, age-adjusted Charlson comorbidity index; CVC, central venous catheter.
