# Supplementary material for: Dynamics and Predictors of Mortality Due to Candidemia Caused by Different Candida Species: Comparison of Intensive Care Unit-Associated Candidemia (ICUAC) and Non-ICUAC
Source: MDPI journal article supplement (doi:10.3390/jof7080597), 2021-07-24
Supplement: s1 [file s1]

**Supplementary Table S1A. Univariate analysis of predictive factors related to 7-, 30- and 90-day mortalities of all candidemia patients**

| Variables                                             | 7-day mortality      |                 | 30-day mortality |                 | 90-day mortality |                 |
|-------------------------------------------------------|----------------------|-----------------|------------------|-----------------|------------------|-----------------|
|                                                       | OR (95% CI)          | <i>p</i> -Value | OR (95% CI)      | <i>p</i> -Value | OR (95% CI)      | <i>p</i> -Value |
| Aged 65 or older                                      | 1.49 (1.08-2.04)     | 0.01            | 1.30 (1.02-1.64) | 0.03            | 1.30 (1.05-1.61) | 0.02            |
| Male                                                  | 0.97 (0.72-1.31)     | 0.84            | 0.93 (0.74-1.17) | 0.53            | 0.99 (0.80-1.23) | 0.96            |
| Community onset                                       | 0.20 (0.06-0.63)     | 0.006           | 0.40 (0.22-0.73) | 0.003           | 0.56 (0.36-0.85) | 0.006           |
| ICU admission                                         | 2.58 (1.88-3.53)     | <0.001          | 2.31 (1.82-2.92) | <0.001          | 2.27 (1.83-2.82) | <0.001          |
| Diabetes mellitus                                     | 1.19 (0.87-1.63)     | 0.28            | 1.10 (0.86-1.41) | 0.43            | 1.09 (0.87-1.37) | 0.45            |
| Liver disease                                         | 1.78 (1.23-2.56)     | 0.002           | 1.78 (1.34-2.38) | <0.001          | 1.77 (1.36-2.32) | <0.001          |
| Chronic kidney disease                                | 1.24 (0.83-1.84)     | 0.29            | 1.35 (1.00-1.81) | 0.05            | 1.42 (1.08-1.85) | 0.01            |
| Chronic obstructive pulmonary disease                 | 1.69 (1.10-2.60)     | 0.02            | 1.62 (1.16-2.27) | 0.005           | 1.70 (1.26-2.31) | 0.001           |
| Congestive heart failure                              | 1.03 (0.54-1.95)     | 0.93            | 1.40 (0.90-2.16) | 0.13            | 1.48 (1.00-2.19) | 0.05            |
| Myocardial infarction                                 | 1.65 (0.97-2.79)     | 0.07            | 1.36 (0.88-2.11) | 0.16            | 1.22 (0.81-1.85) | 0.34            |
| Cerebro-vascular disease or transient ischemic attack | 0.91 (0.57-1.45)     | 0.69            | 0.93 (0.65-1.32) | 0.68            | 1.03 (0.76-1.41) | 0.85            |
| Dementia                                              | 1.42 (0.80-2.49)     | 0.23            | 1.39 (0.89-2.17) | 0.15            | 1.34 (0.89-2.03) | 0.17            |
| Solid tumor                                           | 1.03 (0.76-1.40)     | 0.84            | 0.94 (0.74-1.19) | 0.61            | 0.97 (0.78-1.20) | 0.77            |
| Hematologic malignancies                              | 1.44 (0.86-2.41)     | 0.17            | 1.43 (0.96-2.14) | 0.08            | 1.41 (0.97-2.05) | 0.07            |
| ACCI more than 5                                      | 1.51 (1.10-2.06)     | 0.01            | 1.36 (1.07-1.72) | 0.01            | 1.38 (1.11-1.71) | 0.004           |
| Severe sepsis                                         | 2.66 (1.98-3.59)     | <0.001          | 2.76 (2.19-3.48) | <0.001          | 2.99 (2.42-3.69) | <0.001          |
| Bacteremia                                            | 1.20 (0.84-1.71)     | 0.31            | 1.35 (1.03-1.76) | 0.03            | 1.49 (1.18-1.90) | 0.001           |
| Total parenteral nutrition                            | 1.14 (0.84-1.54)     | 0.39            | 1.26 (1.00-1.58) | 0.05            | 1.34 (1.09-1.66) | 0.006           |
| Prior surgery                                         | 0.66 (0.43-1.03)     | 0.07            | 0.89 (0.66-1.20) | 0.44            | 0.91 (0.69-1.20) | 0.50            |
| Neutropenia                                           | 1.10 (0.68-1.77)     | 0.70            | 1.28 (0.90-1.82) | 0.16            | 1.28 (0.92-1.77) | 0.14            |
| Immunosuppressive therapy                             | 0.73 (0.36-1.48)     | 0.39            | 1.14 (0.73-1.78) | 0.56            | 0.99 (0.64-1.53) | 0.97            |
| Urine catheter placement                              | 2.70 (1.91-3.80)     | <0.001          | 2.77 (2.14-3.59) | <0.001          | 2.96 (2.33-3.76) | <0.001          |
| CVC placement                                         | 2.14 (1.52-3.01)     | <0.001          | 1.89 (1.47-2.43) | <0.001          | 1.92 (1.53-2.42) | <0.001          |
| Prior fungal therapy                                  | 1.00 (0.54-1.85)     | 0.99            | 1.02 (0.64-1.62) | 0.93            | 1.02 (0.67-1.56) | 0.92            |
| CVC removal                                           | 0.18 (0.11-0.30)     | <0.001          | 0.46 (0.32-0.64) | <0.001          | 0.44 (0.32-0.61) | <0.001          |
| Azole monotherapy                                     | 0.16 (0.09-0.27)     | <0.001          | 0.41 (0.31-0.55) | <0.001          | 0.45 (0.35-0.58) | <0.001          |
| Non-azole therapy                                     | 0.17 (0.11-0.29)     | <0.001          | 0.52 (0.40-0.68) | <0.001          | 0.66 (0.53-0.83) | <0.001          |
| Lack of antifungal therapy                            | 13.10 (8.82-19.45)   | <0.001          | 4.03 (3.20-5.09) | <0.001          | 3.18 (2.57-3.93) | <0.001          |
| Fluconazole resistance                                | 1.29 (0.70-2.37)     | 0.42            | 1.55 (0.99-2.41) | 0.05            | 1.49 (0.98-2.25) | 0.06            |
| Micafungin resistance                                 | 0.05 (0.00-1.431.41) | 0.57            | 0.78 (0.11-5.57) | 0.81            | 0.77 (0.11-5.50) | 0.80            |
| Candidemia due to <i>C. albicans</i>                  | 1.05 (0.77-1.41)     | 0.77            | 1.02 (0.81-1.28) | 0.90            | 1.07 (0.86-1.32) | 0.55            |
| Candidemia due to <i>C. tropicalis</i>                | 1.67 (1.19-2.34)     | 0.003           | 1.51 (1.15-1.98) | 0.003           | 1.59 (1.24-2.03) | <0.001          |
| Candidemia due to <i>C. glabrata</i>                  | 0.85 (0.57-1.28)     | 0.44            | 0.91 (0.67-1.23) | 0.55            | 0.93 (0.71-1.23) | 0.61            |

|                                          |                  |      |                  |       |                  |        |
|------------------------------------------|------------------|------|------------------|-------|------------------|--------|
| Candidemia due to <i>C. parapsilosis</i> | 0.53 (0.31-0.91) | 0.02 | 0.52 (0.35-0.78) | 0.002 | 0.46 (0.31-0.67) | <0.001 |
| Uncommon species                         | 0.65 (0.29-1.47) | 0.30 | 1.07 (0.65-1.77) | 0.79  | 0.96 (0.59-1.56) | 0.87   |
| Multiple species                         | 1.17 (0.48-2.85) | 0.73 | 1.26 (0.65-2.45) | 0.50  | 1.06 (0.55-2.06) | 0.86   |

Abbreviations: OR, odds ratio; 95% CI, 95% confidence interval; ICU, intensive care unit; ACCI, age-adjusted Charlson comorbidity index; CVC, central venous catheter.

**Supplementary Table S1B. Univariate analysis of predictive factors related to 7-, 30- and 90-day mortalities of candidemia patients due to *Candida albicans***

| Variables                                             | 7-day mortality          |                 | 30-day mortality  |                 | 90-day mortality  |                 |
|-------------------------------------------------------|--------------------------|-----------------|-------------------|-----------------|-------------------|-----------------|
|                                                       | OR (95% CI)              | <i>p</i> -Value | OR (95% CI)       | <i>p</i> -Value | OR (95% CI)       | <i>p</i> -Value |
| Aged 65 or older                                      | 1.53 (0.93-2.50)         | 0.09            | 1.31 (0.91-1.89)  | 0.15            | 1.41 (1.01-1.98)  | 0.05            |
| Male                                                  | 1.13 (0.71-1.79)         | 0.62            | 1.06 (0.74-1.51)  | 0.76            | 1.14 (0.82-1.58)  | 0.43            |
| Community onset                                       | 0.19 (0.03-1.36)         | 0.10            | 0.56 (0.23-1.38)  | 0.21            | 0.56 (0.25-1.26)  | 0.16            |
| ICU admission                                         | 2.28 (1.42-3.64)         | 0.001           | 1.96 (1.37-2.80)  | <0.001          | 2.00 (1.45-2.77)  | <0.001          |
| Diabetes mellitus                                     | 1.26 (0.78-2.03)         | 0.35            | 1.13 (0.77-1.64)  | 0.54            | 1.15 (0.82-1.62)  | 0.42            |
| Liver disease                                         | 1.73 (0.99-3.01)         | 0.05            | 1.70 (1.10-2.65)  | 0.02            | 1.68 (1.12-2.52)  | 0.01            |
| Chronic kidney disease                                | 1.12 (0.59-2.13)         | 0.72            | 1.25 (0.77-2.01)  | 0.37            | 1.33 (0.87-2.04)  | 0.18            |
| Chronic obstructive pulmonary disease                 | 2.11 (1.14-3.91)         | 0.02            | 2.03 (1.24-3.31)  | 0.005           | 2.01 (1.29-3.14)  | 0.002           |
| Congestive heart failure                              | 0.92 (0.34-2.53)         | 0.88            | 0.98 (0.46-2.11)  | 0.96            | 1.18 (0.62-2.24)  | 0.62            |
| Myocardial infarction                                 | 0.05 (0.00-8.04)         | 0.24            | 0.54 (0.17-1.70)  | 0.29            | 0.74 (0.30-1.80)  | 0.51            |
| Cerebro-vascular disease or transient ischemic attack | 1.06 (0.53-2.12)         | 0.88            | 0.96 (0.55-1.68)  | 0.90            | 1.08 (0.67-1.75)  | 0.76            |
| Dementia                                              | 1.63 (0.75-3.54)         | 0.22            | 1.27 (0.64-2.50)  | 0.49            | 1.29 (0.70-2.39)  | 0.41            |
| Solid tumor                                           | 1.12 (0.71-1.76)         | 0.63            | 1.01 (0.71-1.44)  | 0.95            | 1.06 (0.77-1.46)  | 0.74            |
| Hematologic malignancies                              | 1.78 (0.82-3.88)         | 0.15            | 1.22 (0.60-2.51)  | 0.58            | 0.97 (0.48-1.99)  | 0.94            |
| ACCI more than 5                                      | 1.37 (0.84-2.22)         | 0.21            | 1.19 (0.82-1.71)  | 0.36            | 1.23 (0.88-1.72)  | 0.22            |
| Severe sepsis                                         | 2.43 (1.54-3.84)         | <0.001          | 2.77 (1.94-3.95)  | <0.001          | 2.98 (2.15-4.12)  | <0.001          |
| Bacteremia                                            | 1.21 (0.70-2.08)         | 0.49            | 1.39 (0.92-2.09)  | 0.11            | 1.44 (0.99-2.08)  | 0.05            |
| Total parenteral nutrition                            | 1.12 (0.71-1.78)         | 0.62            | 1.29 (0.91-1.84)  | 0.16            | 1.44 (1.04-1.98)  | 0.03            |
| Prior surgery                                         | 0.41 (0.19-0.90)         | 0.03            | 0.72 (0.44-1.16)  | 0.17            | 0.75 (0.49-1.15)  | 0.19            |
| Neutropenia                                           | 1.13 (0.56-2.26)         | 0.74            | 1.23 (0.73-2.08)  | 0.44            | 1.17 (0.72-1.92)  | 0.53            |
| Immunosuppressive therapy                             | 0.49 (0.15-1.56)         | 0.23            | 0.87 (0.44-1.71)  | 0.68            | 0.69 (0.35-1.35)  | 0.28            |
| Urine catheter use                                    | 2.59 (1.55-4.33)         | <0.001          | 2.71 (1.82-4.02)  | <0.001          | 2.95 (2.06-4.24)  | <0.001          |
| CVC use                                               | 2.55 (1.47-4.44)         | 0.001           | 2.25 (1.50-3.39)  | <0.001          | 2.37 (1.63-3.44)  | <0.001          |
| Prior fungal therapy                                  | 0.87 (0.32-2.39)         | 0.79            | 1.01 (0.49-2.07)  | 0.98            | 0.90 (0.46-1.76)  | 0.75            |
| CVC removal                                           | 0.39 (0.20-0.75)         | 0.005           | 0.44 (0.27-0.73)  | 0.001           | 0.39 (0.25-0.62)  | <0.001          |
| Azole monotherapy                                     | 0.12 (0.05-0.27)         | <0.001          | 0.34 (0.22-0.53)  | <0.001          | 0.41 (0.28-0.59)  | <0.001          |
| Non-azole therapy                                     | 0.16 (0.06-0.40)         | <0.001          | 0.53 (0.34-0.83)  | 0.005           | 0.67 (0.46-0.98)  | 0.04            |
| Lack of antifungal therapy                            | 16.57 (8.70-31.55)       | <0.001          | 4.84 (3.37-6.96)  | <0.001          | 3.69 (2.66-5.11)  | <0.001          |
| Fluconazole resistance                                | 0.05 (0.00-2,235,849.02) | 0.74            | 3.53 (0.49-25.38) | 0.21            | 3.53 (0.49-25.38) | 0.21            |
| Micafungin resistance                                 | -                        | -               | -                 | -               | -                 | -               |

Abbreviations: OR, odds ratio; 95% CI, 95% confidence interval; ICU, intensive care unit; ACCI, age-adjusted Charlson comorbidity index; CVC, central venous catheter.

**Supplementary Table S1C. Univariate analysis of predictive factors related to 7-, 30- and 90-day mortalities of candidemia patients due to *Candida tropicalis***

| Variables                                             | 7-day mortality       |                 | 30-day mortality     |                 | 90-day mortality     |                 |
|-------------------------------------------------------|-----------------------|-----------------|----------------------|-----------------|----------------------|-----------------|
|                                                       | OR (95% CI)           | <i>p</i> -Value | OR (95% CI)          | <i>p</i> -Value | OR (95% CI)          | <i>p</i> -Value |
| Aged 65 or older                                      | 1.17 (0.66-2.09)      | 0.59            | 1.21 (0.75-1.93)     | 0.44            | 1.09 (0.71-1.66)     | 0.71            |
| Male                                                  | 1.08 (0.60-1.95)      | 0.81            | 1.05 (0.65-1.69)     | 0.86            | 1.08 (0.70-1.68)     | 0.72            |
| Community onset                                       | 1.02 (0.25-4.22)      | 0.98            | 0.63 (0.15-2.57)     | 0.52            | 0.53 (0.13-2.16)     | 0.38            |
| ICU admission                                         | 1.77 (0.95-3.28)      | 0.07            | 1.97 (1.19-3.26)     | 0.009           | 2.05 (1.29-3.23)     | 0.002           |
| Diabetes mellitus                                     | 0.81 (0.41-1.60)      | 0.55            | 1.07 (0.64-1.79)     | 0.79            | 0.86 (0.52-1.41)     | 0.54            |
| Liver disease                                         | 1.38 (0.70-2.72)      | 0.35            | 1.59 (0.93-2.72)     | 0.09            | 1.69 (1.03-2.77)     | 0.04            |
| Chronic kidney disease                                | 1.00 (0.47-2.14)      | 1.00            | 1.56 (0.91-2.70)     | 0.11            | 1.60 (0.96-2.68)     | 0.07            |
| Chronic obstructive pulmonary disease                 | 1.18 (0.46-2.98)      | 0.73            | 1.06 (0.48-2.31)     | 0.89            | 1.21 (0.61-2.42)     | 0.59            |
| Congestive heart failure                              | 1.83 (0.72-4.62)      | 0.20            | 2.38 (1.18-4.81)     | 0.02            | 2.05 (1.02-4.09)     | 0.04            |
| Myocardial infarction                                 | 1.50 (0.59-3.80)      | 0.39            | 1.36 (0.62-2.97)     | 0.44            | 1.12 (0.52-2.43)     | 0.77            |
| Cerebro-vascular disease or transient ischemic attack | 0.54 (0.17-1.74)      | 0.30            | 0.56 (0.23-1.40)     | 0.22            | 0.62 (0.29-1.35)     | 0.23            |
| Dementia                                              | 0.81 (0.20-3.34)      | 0.77            | 1.39 (0.56-3.44)     | 0.48            | 1.11 (0.45-2.73)     | 0.83            |
| Solid tumor                                           | 0.73 (0.38-1.40)      | 0.34            | 0.82 (0.49-1.37)     | 0.44            | 0.88 (0.55-1.40)     | 0.58            |
| Hematologic malignancies                              | 1.17 (0.52-2.63)      | 0.70            | 1.25 (0.66-2.39)     | 0.49            | 1.25 (0.69-2.25)     | 0.46            |
| ACCI more than 5                                      | 1.23 (0.68-2.22)      | 0.50            | 1.44 (0.89-2.36)     | 0.14            | 1.53 (0.98-2.39)     | 0.06            |
| Severe sepsis                                         | 2.76 (1.54-4.95)      | 0.001           | 2.81 (1.75-4.50)     | <0.001          | 3.07 (1.99-4.74)     | <0.001          |
| Bacteremia                                            | 1.00 (0.51-1.97)      | 1.00            | 1.06 (0.61-1.83)     | 0.84            | 1.29 (0.80-2.08)     | 0.30            |
| Total parenteral nutrition                            | 1.09 (0.61-1.94)      | 0.78            | 1.05 (0.65-1.68)     | 0.85            | 1.11 (0.72-1.70)     | 0.64            |
| Prior surgery                                         | 0.84 (0.39-1.80)      | 0.65            | 0.87 (0.48-1.60)     | 0.66            | 0.84 (0.49-1.46)     | 0.54            |
| Neutropenia                                           | 1.37 (0.61-3.07)      | 0.44            | 1.79 (0.96-3.35)     | 0.07            | 1.78 (0.98-3.24)     | 0.06            |
| Immunosuppressive therapy                             | 0.59 (0.14-2.45)      | 0.47            | 1.00 (0.40-2.47)     | 0.99            | 0.78 (0.32-1.94)     | 0.60            |
| Urine catheter placement                              | 2.86 (1.45-5.63)      | 0.002           | 2.87 (1.67-4.91)     | <0.001          | 3.29 (2.01-5.41)     | <0.001          |
| CVC placement                                         | 1.82 (0.98-3.36)      | 0.06            | 1.70 (1.04-2.77)     | 0.04            | 1.78 (1.14-2.78)     | 0.01            |
| Prior fungal therapy                                  | 0.36 (0.05-2.64)      | 0.32            | 0.50 (0.12-2.04)     | 0.33            | 0.61 (0.19-1.92)     | 0.39            |
| CVC removal                                           | 0.40 (0.15-1.05)      | 0.06            | 0.64 (0.32-1.26)     | 0.20            | 0.61 (0.32-1.13)     | 0.12            |
| Azole monotherapy                                     | 0.32 (0.13-0.82)      | 0.02            | 0.51 (0.27-0.95)     | 0.03            | 0.46 (0.26-0.81)     | 0.007           |
| Non-azole therapy                                     | 0.32 (0.16-0.64)      | 0.001           | 0.52 (0.32-0.85)     | 0.009           | 0.67 (0.44-1.04)     | 0.07            |
| Lack of antifungal therapy                            | 6.43 (3.48-11.89)     | <0.001          | 3.69 (2.29-5.93)     | <0.001          | 3.14 (2.03-4.85)     | <0.001          |
| Fluconazole resistance                                | 1.72 (0.24-12.47)     | 0.59            | 1.14 (0.16-8.21)     | 0.90            | 1.92 (0.47-7.83)     | 0.36            |
| Micafungin resistance                                 | 0.05 (0.00-91,794.28) | 0.68            | 0.05 (0.00-2,457.45) | 0.59            | 0.05 (0.00-2,457.45) | 0.59            |

Abbreviations: OR, odds ratio; 95% CI, 95% confidence interval; ICU, intensive care unit; ACCI, age-adjusted Charlson comorbidity index; CVC, central venous catheter.

**Supplementary Table S1D. Univariate analysis of predictive factors related to 7-, 30- and 90-day mortalities of candidemia patients due to *Candida glabrata***

| Variables                                             | 7-day mortality       |                 | 30-day mortality  |                 | 90-day mortality  |                 |
|-------------------------------------------------------|-----------------------|-----------------|-------------------|-----------------|-------------------|-----------------|
|                                                       | OR (95% CI)           | <i>p</i> -Value | OR (95% CI)       | <i>p</i> -Value | OR (95% CI)       | <i>p</i> -Value |
| Aged 65 or older                                      | 1.67 (0.68-4.13)      | 0.26            | 1.03 (0.57-1.86)  | 0.92            | 1.07 (0.62-1.83)  | 0.82            |
| Male                                                  | 1.17 (0.56-2.48)      | 0.67            | 1.06 (0.61-1.84)  | 0.84            | 1.18 (0.71-1.96)  | 0.53            |
| Community onset                                       | 0.04 (0.00-3.37)      | 0.15            | 0.41 (0.15-1.13)  | 0.09            | 0.51 (0.22-1.19)  | 0.12            |
| ICU admission                                         | 3.74 (1.69-8.28)      | 0.001           | 2.73 (1.56-4.76)  | <0.001          | 2.50 (1.51-4.14)  | <0.001          |
| Diabetes mellitus                                     | 1.41 (0.66-3.01)      | 0.37            | 0.79 (0.43-1.47)  | 0.46            | 1.01 (0.59-1.72)  | 0.98            |
| Liver disease                                         | 1.99 (0.81-4.91)      | 0.14            | 1.84 (0.92-3.68)  | 0.08            | 1.66 (0.86-3.19)  | 0.13            |
| Chronic kidney disease                                | 3.15 (1.42-6.98)      | 0.005           | 1.64 (0.82-3.27)  | 0.16            | 1.78 (0.96-3.29)  | 0.07            |
| Chronic obstructive pulmonary disease                 | 1.87 (0.71-4.93)      | 0.20            | 1.68 (0.79-3.58)  | 0.18            | 1.77 (0.90-3.49)  | 0.10            |
| Congestive heart failure                              | 0.80 (0.11-5.91)      | 0.83            | 1.39 (0.43-4.46)  | 0.58            | 1.55 (0.56-4.28)  | 0.40            |
| Myocardial infarction                                 | 2.76 (0.96-7.97)      | 0.06            | 1.83 (0.73-4.62)  | 0.20            | 1.47 (0.59-3.67)  | 0.41            |
| Cerebro-vascular disease or transient ischemic attack | 1.56 (0.63-3.85)      | 0.33            | 1.67 (0.86-3.25)  | 0.13            | 1.67 (0.91-3.09)  | 0.10            |
| Dementia                                              | 1.90 (0.57-6.28)      | 0.30            | 1.89 (0.75-4.76)  | 0.18            | 1.90 (0.82-4.42)  | 0.14            |
| Solid tumor                                           | 1.16 (0.55-2.44)      | 0.70            | 0.96 (0.55-1.67)  | 0.88            | 0.90 (0.54-1.50)  | 0.69            |
| Hematologic malignancies                              | 1.08 (0.26-4.56)      | 0.92            | 2.02 (0.86-4.75)  | 0.11            | 2.11 (0.96-4.63)  | 0.06            |
| ACCI more than 5                                      | 1.85 (0.78-4.35)      | 0.16            | 1.16 (0.65-2.08)  | 0.62            | 0.99 (0.59-1.67)  | 0.97            |
| Severe sepsis                                         | 1.96 (0.92-4.18)      | 0.08            | 2.03 (1.15-3.55)  | 0.01            | 2.43 (1.46-4.04)  | 0.001           |
| Bacteremia                                            | 1.98 (0.92-4.30)      | 0.08            | 2.31 (1.31-4.08)  | 0.004           | 2.39 (1.43-4.02)  | 0.001           |
| Total parenteral nutrition                            | 1.83 (0.87-3.85)      | 0.11            | 1.60 (0.92-2.78)  | 0.10            | 1.67 (1.01-2.77)  | 0.05            |
| Prior surgery                                         | 0.83 (0.29-2.39)      | 0.73            | 1.22 (0.61-2.45)  | 0.57            | 1.26 (0.67-2.36)  | 0.48            |
| Neutropenia                                           | 0.41 (0.06-2.99)      | 0.38            | 0.95 (0.34-2.63)  | 0.92            | 1.05 (0.42-2.64)  | 0.91            |
| Immunosuppressive therapy                             | 1.01 (0.14-7.45)      | 0.99            | 1.05 (0.26-4.33)  | 0.94            | 0.83 (0.20-3.41)  | 0.80            |
| Urine catheter placement                              | 3.09 (1.31-7.27)      | 0.01            | 2.54 (1.40-4.59)  | 0.002           | 2.54 (1.48-4.34)  | 0.001           |
| CVC placement                                         | 2.86 (1.16-7.06)      | 0.02            | 1.97 (1.08-3.61)  | 0.03            | 1.66 (0.97-2.83)  | 0.07            |
| Prior fungal therapy                                  | 1.17 (0.28-4.92)      | 0.83            | 0.96 (0.30-3.07)  | 0.94            | 1.06 (0.39-2.93)  | 0.91            |
| CVC removal                                           | 0.20 (0.03-1.49)      | 0.12            | 0.61 (0.23-1.57)  | 0.30            | 0.91 (0.42-2.00)  | 0.82            |
| Azole monotherapy                                     | 0.04 (0.00-4.92)      | 0.19            | 0.73 (0.29-1.85)  | 0.51            | 0.62 (0.25-1.54)  | 0.30            |
| Non-azole therapy                                     | 0.03 (0.00-0.24)      | 0.001           | 0.32 (0.17-0.58)  | <0.001          | 0.49 (0.29-0.82)  | 0.006           |
| Lack of antifungal therapy                            | 53.11 (7.21-391.38)   | <0.001          | 3.55 (2.02-6.26)  | <0.001          | 2.54 (1.53-4.21)  | <0.001          |
| Fluconazole resistance                                | 2.81 (0.97-8.12)      | 0.06            | 2.63 (1.12-6.19)  | 0.03            | 2.58 (1.17-5.68)  | 0.02            |
| Micafungin resistance                                 | 0.05 (0.00-34,952.09) | 0.66            | 1.39 (0.19-10.04) | 0.75            | 1.39 (0.19-10.04) | 0.75            |

Abbreviations: OR, odds ratio; 95% CI, 95% confidence interval; ICU, intensive care unit; ACCI, age-adjusted Charlson comorbidity index; CVC, central venous catheter.

**Supplementary Table S1E. Univariate analysis of predictive factors related to 7-, 30- and 90-day mortalities of candidemia patients due to *Candida parapsilosis***

| Variables                                             | 7-day mortality              |                 | 30-day mortality  |                 | 90-day mortality  |                 |
|-------------------------------------------------------|------------------------------|-----------------|-------------------|-----------------|-------------------|-----------------|
|                                                       | OR (95% CI)                  | <i>p</i> -Value | OR (95% CI)       | <i>p</i> -Value | OR (95% CI)       | <i>p</i> -Value |
| Aged 65 or older                                      | 3.85 (1.07-13.80)            | 0.04            | 2.32 (1.00-5.37)  | 0.05            | 2.36 (1.07-5.22)  | 0.03            |
| Male                                                  | 0.37 (0.13-1.05)             | 0.06            | 0.54 (0.24-1.19)  | 0.13            | 0.65 (0.30-1.40)  | 0.27            |
| Community onset                                       | 0.04 (0.00-156.94)           | 0.45            | 0.04 (0.00-15.00) | 0.29            | 0.04 (0.00-10.07) | 0.26            |
| ICU admission                                         | 3.53 (1.11-11.27)            | 0.03            | 3.71 (1.55-8.87)  | 0.003           | 3.61 (1.59-8.19)  | 0.002           |
| Diabetes mellitus                                     | 0.74 (0.21-2.66)             | 0.65            | 1.07 (0.45-2.56)  | 0.88            | 1.11 (0.49-2.51)  | 0.81            |
| Liver disease                                         | 1.20 (0.16-9.20)             | 0.86            | 1.84 (0.92-3.68)  | 0.08            | 0.60 (0.08-4.46)  | 0.62            |
| Chronic kidney disease                                | 0.56 (0.07-4.24)             | 0.57            | 0.59 (0.14-2.52)  | 0.48            | 0.81 (0.25-2.69)  | 0.74            |
| Chronic obstructive pulmonary disease                 | 0.85 (0.11-6.49)             | 0.87            | 2.17 (0.74-6.32)  | 0.16            | 2.59 (0.98-6.83)  | 0.05            |
| Congestive heart failure                              | 0.05 (0.00-942.76)           | 0.54            | 1.37 (0.32-5.82)  | 0.67            | 1.93 (0.58-6.39)  | 0.28            |
| Myocardial infarction                                 | 4.04 (1.12-14.53)            | 0.03            | 2.08 (0.62-6.96)  | 0.24            | 1.78 (0.54-5.92)  | 0.34            |
| Cerebro-vascular disease or transient ischemic attack | 0.39 (0.05-2.95)             | 0.36            | 0.66 (0.20-2.22)  | 0.51            | 1.07 (0.41-2.82)  | 0.89            |
| Dementia                                              | 0.05 (0.00-1,173,828.13)     | 0.73            | 2.19 (0.30-16.21) | 0.44            | 1.99 (0.27-14.65) | 0.50            |
| Solid tumor                                           | 1.05 (0.35-3.13)             | 0.93            | 0.76 (0.32-1.81)  | 0.53            | 0.78 (0.34-1.78)  | 0.56            |
| Hematologic malignancies                              | 0.05 (0.00-1,270,941,830.07) | 0.81            | 5.50 (0.73-41.20) | 0.10            | 5.50 (0.73-41.20) | 0.10            |
| ACCI more than 5                                      | 1.75 (0.62-5.00)             | 0.29            | 1.42 (0.64-3.13)  | 0.39            | 1.62 (0.77-3.41)  | 0.20            |
| Severe sepsis                                         | 3.93 (1.36-11.34)            | 0.01            | 3.69 (1.65-8.21)  | 0.001           | 3.78 (1.76-8.09)  | 0.001           |
| Bacteremia                                            | 0.04 (0.00-53.53)            | 0.38            | 0.62 (0.15-2.62)  | 0.52            | 0.85 (0.26-2.82)  | 0.79            |
| Total parenteral nutrition                            | 1.33 (0.47-3.80)             | 0.59            | 1.71 (0.78-3.76)  | 0.18            | 1.56 (0.74-3.28)  | 0.24            |
| Prior surgery                                         | 0.85 (0.19-3.81)             | 0.84            | 0.93 (0.32-2.72)  | 0.90            | 1.07 (0.41-2.81)  | 0.89            |
| Neutropenia                                           | 0.85 (0.11-6.49)             | 0.87            | 0.95 (0.22-4.03)  | 0.94            | 0.82 (0.19-3.46)  | 0.79            |
| Immunosuppressive therapy                             | 2.81 (0.37-21.48)            | 0.32            | 1.60 (0.22-11.84) | 0.65            | 1.39 (0.19-10.26) | 0.75            |
| Urine catheter placement                              | 1.74 (0.58-5.20)             | 0.32            | 3.13 (1.25-7.83)  | 0.02            | 3.70 (1.50-9.14)  | 0.004           |
| CVC placement                                         | 1.47 (0.49-4.39)             | 0.49            | 1.48 (0.66-3.36)  | 0.34            | 1.76 (0.80-3.89)  | 0.16            |
| Prior fungal therapy                                  | 3.33 (0.74-14.94)            | 0.12            | 1.97 (0.46-8.37)  | 0.36            | 1.73 (0.41-7.29)  | 0.46            |
| CVC removal                                           | 0.16 (0.02-1.25)             | 0.08            | 0.37 (0.12-1.14)  | 0.08            | 0.27 (0.09-0.83)  | 0.02            |
| Azole monotherapy                                     | 0.07 (0.01-0.54)             | 0.01            | 0.33 (0.14-0.78)  | 0.01            | 0.46 (0.21-0.99)  | 0.05            |
| Non-azole therapy                                     | 0.03 (0.00-7.78)             | 0.22            | 0.46 (0.14-1.54)  | 0.21            | 0.40 (0.12-1.34)  | 0.14            |
| Lack of antifungal therapy                            | 37.22 (4.86-285.12)          | <0.001          | 5.14 (2.30-11.51) | <0.001          | 4.12 (1.95-8.73)  | <0.001          |
| Fluconazole resistance                                | 0.05 (0.00-8,416.98)         | 0.62            | 1.10 (0.15-8.15)  | 0.93            | 1.00 (0.14-7.35)  | 1.00            |
| Micafungin resistance                                 | -                            | -               | -                 | -               | -                 | -               |

Abbreviations: OR, odds ratio; 95% CI, 95% confidence interval; ICU, intensive care unit; ACCI, age-adjusted Charlson comorbidity index; CVC, central venous catheter.
